# Supplementary material for: Synthesis of template-free magnetite nanospheres grown on Sb2WO6 hierarchical structures for sunlight-driven photo-Fenton catalysis of organic pollutants
Source: Royal Society of Chemistry journal article supplement (doi:10.1039/d4nj01160k), 2024-01-01
Supplement: d4nj01160k1.pdf [file d4nj01160k1.pdf]

## Supporting Information

### Synthesis of Template-Free Magnetite nanospheres fabricated on $\text{Sb}_2\text{WO}_6$ hierarchical structures for Sunlight-Driven Photo-Fenton Catalysis of organic pollutants

Abeer A. AlObaid<sup>1</sup>, Vipin Shrotriya<sup>2</sup>, Girraj Sharma<sup>3</sup>, Ghazanfar Nazir<sup>4</sup> and \*Zia ul

<sup>1</sup>Department of chemistry, College of Science, King Saud University, P.O. Box 2455, Riyadh 11451, Saudi Arabia.

<sup>2</sup>Department of Physics, Government Degree College, Porsa Morena, M.P. 476115-India.

<sup>3</sup>Jindal Institute of Behavioural Sciences, O.P. Jindal Global (an Institute of Eminence) university, Sonapat, Haryana, 131001-India

<sup>4</sup>Department of Nanotechnology and Advanced Materials Engineering, Sejong University, Seoul 05006, Republic of Korea

<sup>5</sup>Department of Chemistry, University of Kashmir, India.

\*Email: [Zia.scholar@kashmiruniversity.net](mailto:Zia.scholar@kashmiruniversity.net)

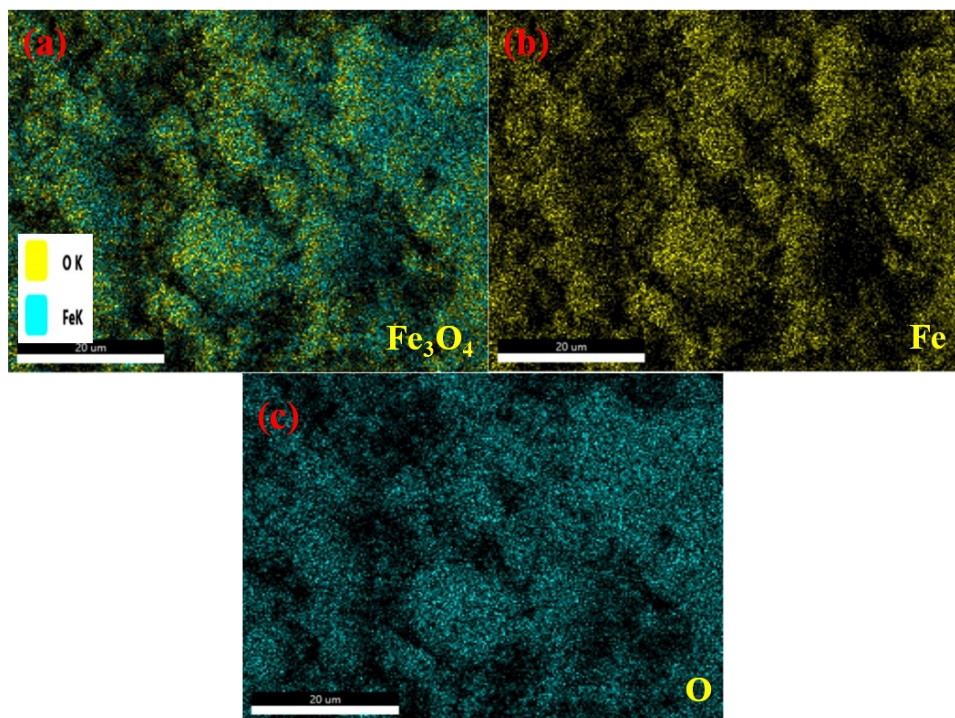

Figure S1. (A) Elemental mapping images of  $\text{Fe}_3\text{O}_4$ .

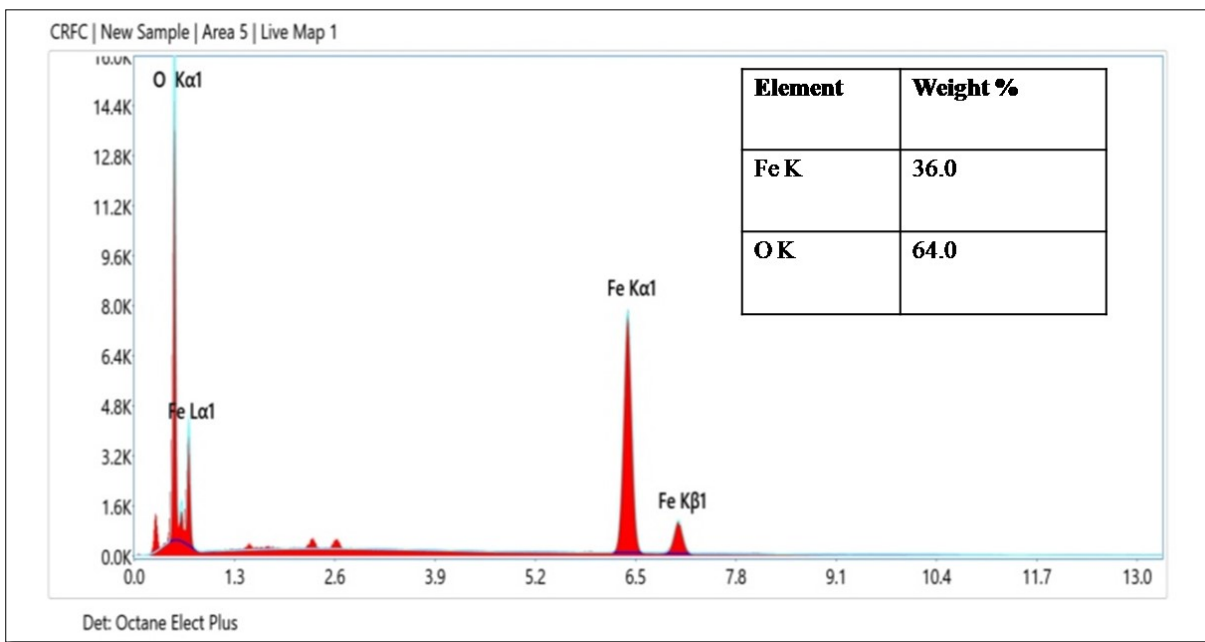

Figure S1. (B) EDS spectra of Fe<sub>3</sub>O<sub>4</sub>.

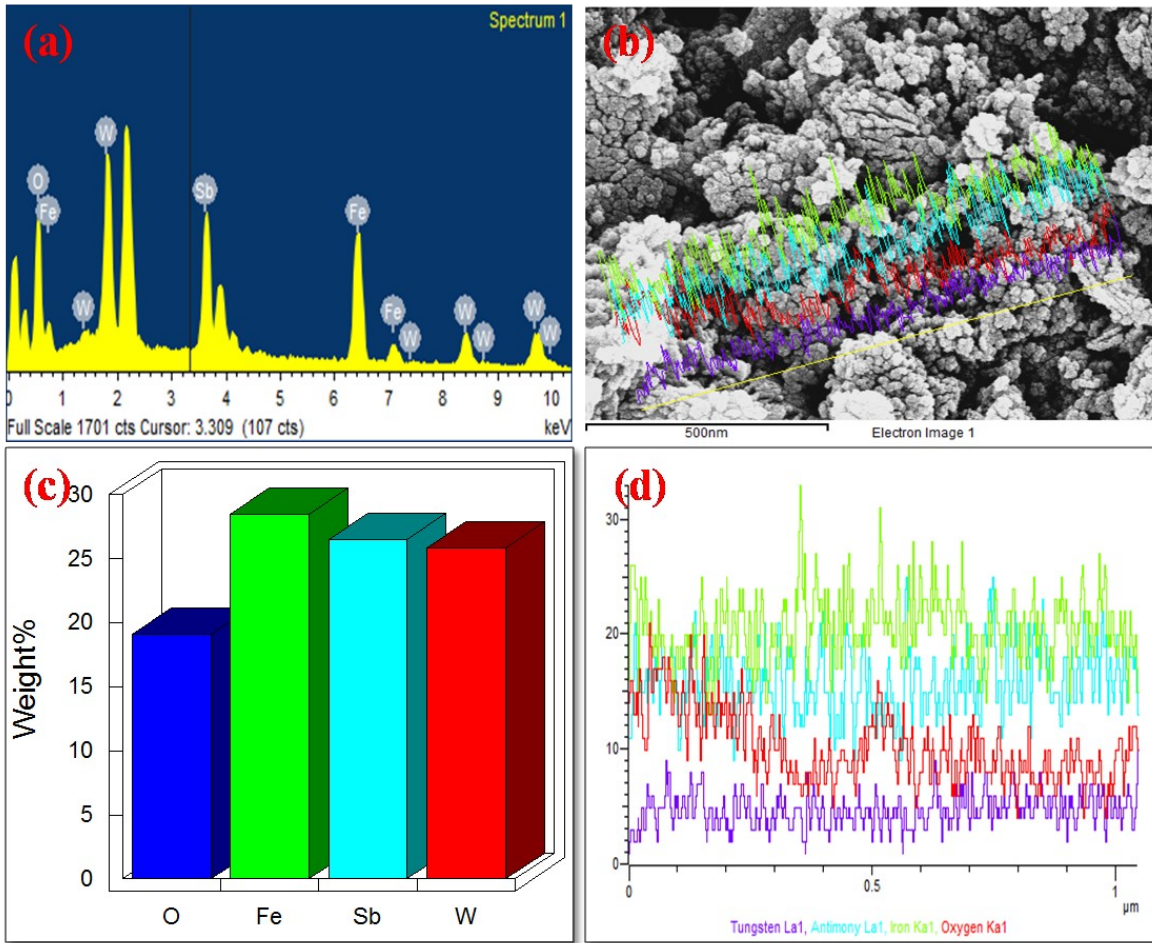

Figure S1. (C) EDS spectra of Fe<sub>3</sub>O<sub>4</sub>/Sb<sub>2</sub>WO<sub>6</sub> (a); SEM micrograph of Fe<sub>3</sub>O<sub>4</sub>/Sb<sub>2</sub>WO<sub>6</sub> (b); weight percentage of respective elements in Fe<sub>3</sub>O<sub>4</sub>/Sb<sub>2</sub>WO<sub>6</sub> (c); vibrational spectra from respective elements in SEM micrographs.

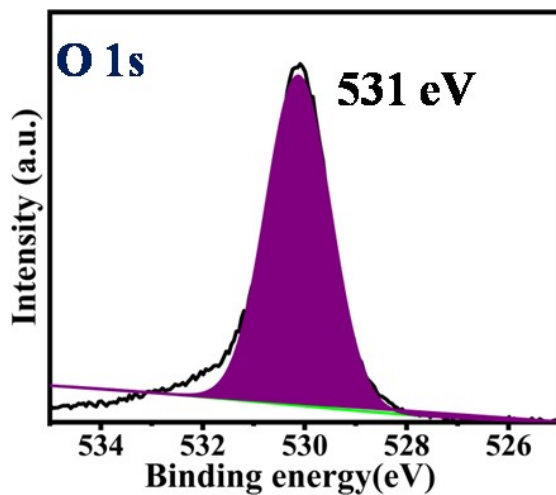

Figure. S2: Deconvoluted XPS spectra of oxygen.

| No. | Systems                                                                                            | K (min <sup>-1</sup> ) | R-Square |
|-----|----------------------------------------------------------------------------------------------------|------------------------|----------|
| 1   | MB+Fe <sub>3</sub> O <sub>4</sub> / Sb <sub>2</sub> WO <sub>6</sub> +H <sub>2</sub> O <sub>2</sub> | 0.06607 ± 9.03747      | 0.998    |
| 2   | MB+Fe <sub>3</sub> O <sub>4</sub> / Sb <sub>2</sub> WO <sub>6</sub>                                | 0.04675 ± 0.00101      | 0.988    |
| 3   | MB+Fe <sub>3</sub> O <sub>4</sub> +H <sub>2</sub> O <sub>2</sub>                                   | 0.05574 ± 5.9591       | 0.975    |
| 4   | MB+Fe <sub>3</sub> O <sub>4</sub> / Sb <sub>2</sub> WO <sub>6</sub>                                | 0.02313 ± 8.42724E-4   | 0.973    |
| 5   | MB+Sb <sub>2</sub> WO <sub>6</sub>                                                                 | 0.02212 ± 0.00295      | 0.971    |
| 6   | MB+Fe <sub>3</sub> O <sub>4</sub>                                                                  | 0.02588 ± 0.00391      | 0.984    |
| 7   | MB+H <sub>2</sub> O <sub>2</sub>                                                                   | 0.02487 ± 0.00523      | 0.981    |

Figure. S3: The kinetic parameters of different reaction systems.

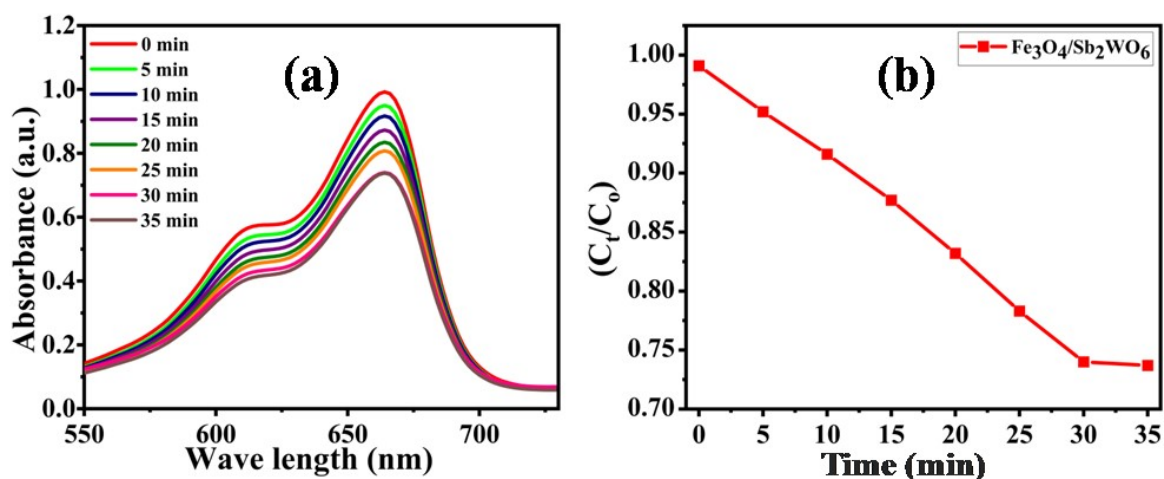

Figure. S4: (a) Adsorption spectra of [MB] = 2.5 ppm, [Fe<sub>3</sub>O<sub>4</sub>/Sb<sub>2</sub>WO<sub>6</sub>] = 4 mg/L, pH = 3);

(b)  $C_t/C_0$  vs time calibration plot of MB

| No. | Kinetic Models | k                 | R-Square |
|-----|----------------|-------------------|----------|
| 1   | zero-order     | 0.00027±2.01343   | 0.955    |
| 2   | first-order    | 0.06607 ± 9.03747 | 0.998    |
| 3   | second-order   | 0.00165±6.00478   | 0.972    |

Figure. S5: The parameters of three kinetic models.

| Time (min) | COD (ppm) | TOC (ppm) |
|------------|-----------|-----------|
| 0          | 141.2     | 224.24    |
| 5          | 120.12    | 147.85    |
| 10         | 73.14     | 90.34     |
| 15         | 48.35     | 50.12     |
| 20         | 32.25     | 36.39     |
| 25         | 19.99     | 20.43     |
| 30         | 12.64     | 12.53     |
| 35         | 8.82      | 2.31      |

Figure. S6: Chemical oxygen demand (COD) and Total organic carbon (TOC) of Methylene Blue against  $\text{Fe}_3\text{O}_4/\text{Sb}_2\text{WO}_6$  photocatalysts

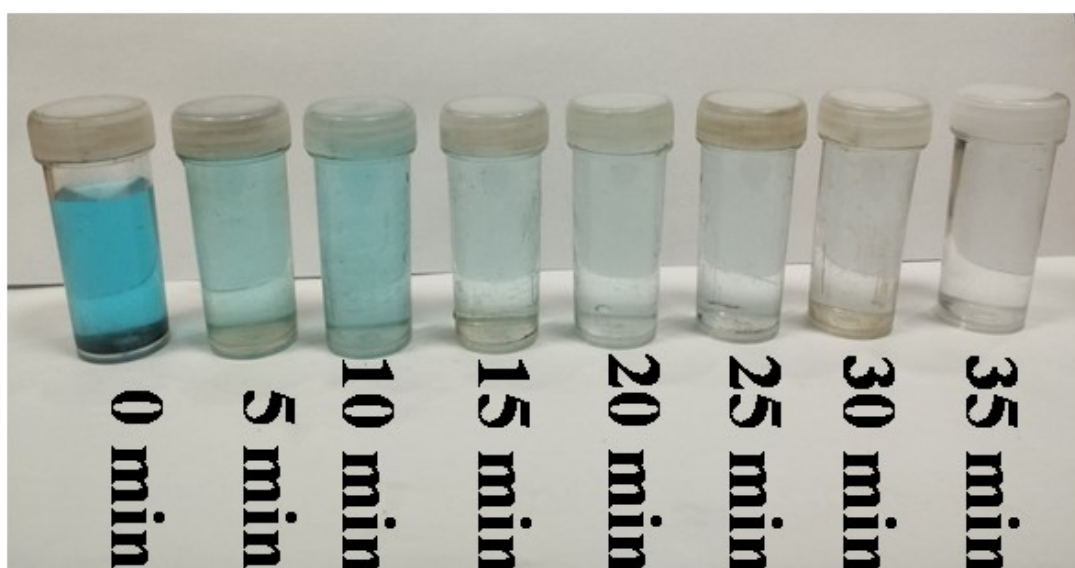

Figure. S7: Change in colour depth during dye degradation.
